# Supplementary material
Source: Research Square preprint supplement (doi:10.21203/rs.3.rs-9554606/v1)
Supplement: Supplementary file 1 [file 019b509c223cceaeea34815e.pdf]

## SUPPLEMENTARY INFORMATION

**Supplementary Table 1: Definitions of the long-term complications**

| <b>Complication</b>              | <b>Definition</b>                                                                                                                                                                                                                                                                                                                                                                                                                                                                                                                                                                                                                                        |
|----------------------------------|----------------------------------------------------------------------------------------------------------------------------------------------------------------------------------------------------------------------------------------------------------------------------------------------------------------------------------------------------------------------------------------------------------------------------------------------------------------------------------------------------------------------------------------------------------------------------------------------------------------------------------------------------------|
| <b>Alopecia</b>                  | Permanent alopecia (partial or complete), as clinically assessed                                                                                                                                                                                                                                                                                                                                                                                                                                                                                                                                                                                         |
| <b>Cardiomyopathy</b>            | Left ventricular fractional shortening <28% or left ventricular ejection fraction <55% or treatment for cardiomyopathy or cardiac transplantation                                                                                                                                                                                                                                                                                                                                                                                                                                                                                                        |
| <b>Cataract</b>                  | Documented cataract                                                                                                                                                                                                                                                                                                                                                                                                                                                                                                                                                                                                                                      |
| <b>Chronic kidney disease</b>    | Documented chronic kidney disease                                                                                                                                                                                                                                                                                                                                                                                                                                                                                                                                                                                                                        |
| <b>Coronary artery disease</b>   | Documented coronary artery disease                                                                                                                                                                                                                                                                                                                                                                                                                                                                                                                                                                                                                       |
| <b>Diabetes</b>                  | Documented diabetes                                                                                                                                                                                                                                                                                                                                                                                                                                                                                                                                                                                                                                      |
| <b>Gonadal dysfunction</b>       | Gonadal dysfunction is defined as follows: 1) In males: Total testosterone deficiency was defined as a testosterone level <12 nmol/l or elevated LH >10 UI/l or testosterone replacement therapy. 2) In females: association of an oligo/amenorrhea for at least 4 months, and an elevated FSH level >25 IU/L on 2 occasions at 4 weeks apart                                                                                                                                                                                                                                                                                                            |
| <b>Hearing loss</b>              | Documented hearing loss, with or without hearing aid                                                                                                                                                                                                                                                                                                                                                                                                                                                                                                                                                                                                     |
| <b>Hypothyroidism</b>            | Nontransient elevation of thyroid-stimulating hormone (TSH), with overt hypothyroidism if the elevated TSH is associated with decreased levels of free thyroxine (T4) or triiodothyronine (T3)                                                                                                                                                                                                                                                                                                                                                                                                                                                           |
| <b>Iron overload</b>             | Ferritin $\geq$ 1500 ng/ml at least 1 year after leukemia therapy, without concurrent inflammation                                                                                                                                                                                                                                                                                                                                                                                                                                                                                                                                                       |
| <b>Metabolic syndrome</b>        | Metabolic syndrome is evaluated in patients aged $\geq$ 18 years based on the presence of $\geq$ 3 of the five National Cholesterol Education Program - Adult Treatment Panel III (NCEP-ATPIII) diagnostic criteria: 1) fasting blood sugar $\geq$ 5.55 mmol/L or on treatment for hyperglycemia; 2) systolic blood pressure (BP) $\geq$ 130 mmHg or diastolic BP $\geq$ 85 mmHg, or on therapy (BP measured using a sphygmomanometer); 3) abdominal circumference $\geq$ 102 cm in males and $\geq$ 88 cm in females (measured midway between the iliac crest and the last rib); 4) triglyceridemia $\geq$ 1.7 mmol/L or on therapy; 5) HDL-cholesterol |
| <b>Neurological complication</b> | Any significant central nervous system complication                                                                                                                                                                                                                                                                                                                                                                                                                                                                                                                                                                                                      |
| <b>Obesity</b>                   | Body mass index (BMI) $\geq$ 30 kg/m <sup>2</sup> in adults, or BMI $\geq$ the age- and sex-specific international obesity task force (IOTF)-30 cutoff at evaluation in children/adolescents.                                                                                                                                                                                                                                                                                                                                                                                                                                                            |
| <b>Osteonecrosis</b>             | Osteonecrosis, confirmed by imaging                                                                                                                                                                                                                                                                                                                                                                                                                                                                                                                                                                                                                      |
| <b>Osteoporosis</b>              | Bone mineral density Z-score (age-adjusted) of the lumbar spine or femoral neck $\leq$ -2, as assessed using a dual-energy X-ray absorptiometry (DXA) scan                                                                                                                                                                                                                                                                                                                                                                                                                                                                                               |

|                                                        |                                                                                                                                                                                                                                                                                                                                                     |
|--------------------------------------------------------|-----------------------------------------------------------------------------------------------------------------------------------------------------------------------------------------------------------------------------------------------------------------------------------------------------------------------------------------------------|
| <b>Pulmonary dysfunction</b>                           | Pulmonary dysfunction is characterized by obstructive syndrome, defined as an abnormal forced expiratory volume in one second to forced vital capacity ratio (FEV1/FVC), or restrictive syndrome, defined as an abnormal total lung capacity (TLC), abnormal diffusion capacity for carbon monoxide (DLCO), or treatment for pulmonary dysfunction. |
| <b>Short stature</b>                                   | Short stature is defined as a change in the SDS for height of $\leq -2$ . This change is calculated by subtracting the SDS at the follow-up visit from the SDS at diagnosis                                                                                                                                                                         |
| <b>Stroke</b>                                          | Stroke, confirmed by imaging                                                                                                                                                                                                                                                                                                                        |
| <b>Subsequent malignant neoplasms &amp; meningioma</b> | Any histologically proven secondary malignant tumor or meningioma                                                                                                                                                                                                                                                                                   |
| <b>Underweight</b>                                     | Body mass index (BMI) $< 17 \text{ kg/m}^2$ in adults, or BMI $<$ the age- and sex-specific IOTF-17 cutoff at evaluation in children/adolescents.                                                                                                                                                                                                   |

---

**Supplementary Table 2: Health-related quality of life according to age group**

| QoL dimension                         | Yonger group*<br>(n=14) | Older group*<br>(n=50) | Adjusted effect<br>on QoL** |         |
|---------------------------------------|-------------------------|------------------------|-----------------------------|---------|
|                                       | mean $\pm$ SEM          |                        | $\beta$                     | p-value |
| Physical abilities                    | 85 $\pm$ 7              | 89 $\pm$ 2             | -1.4                        | 0.79    |
| Social life                           | 75 $\pm$ 8              | 68 $\pm$ 4             | 9.2                         | 0.28    |
| Limitations due to physical condition | 79 $\pm$ 6              | 81 $\pm$ 4             | -1.7                        | 0.82    |
| Limitations due to emotional state    | 65 $\pm$ 4              | 67 $\pm$ 3             | -0.5                        | 0.92    |
| Mental health                         | 68 $\pm$ 6              | 61 $\pm$ 3             | 9.1                         | 0.17    |
| Vitality                              | 52 $\pm$ 6              | 55 $\pm$ 3             | 0.4                         | 0.94    |
| Physical pain                         | 77 $\pm$ 7              | 71 $\pm$ 4             | 7.9                         | 0.27    |
| Perceived health                      | 60 $\pm$ 6              | 59 $\pm$ 4             | 3.4                         | 0.67    |
| <b>Physical composite score</b>       | 54 $\pm$ 2              | 54 $\pm$ 1             | 1.1                         | 0.69    |
| <b>Psychological composite score</b>  | 42 $\pm$ 3              | 40 $\pm$ 2             | 2.7                         | 0.44    |

\*Younger group: 2 to <4 years at HSCT; Older group: 4 to <9 years (girls), 4 to <10 years (boys) at HSCT.

\*\*Adjusted for potential confounders: age at evaluation and sex.

QoL: quality of life.

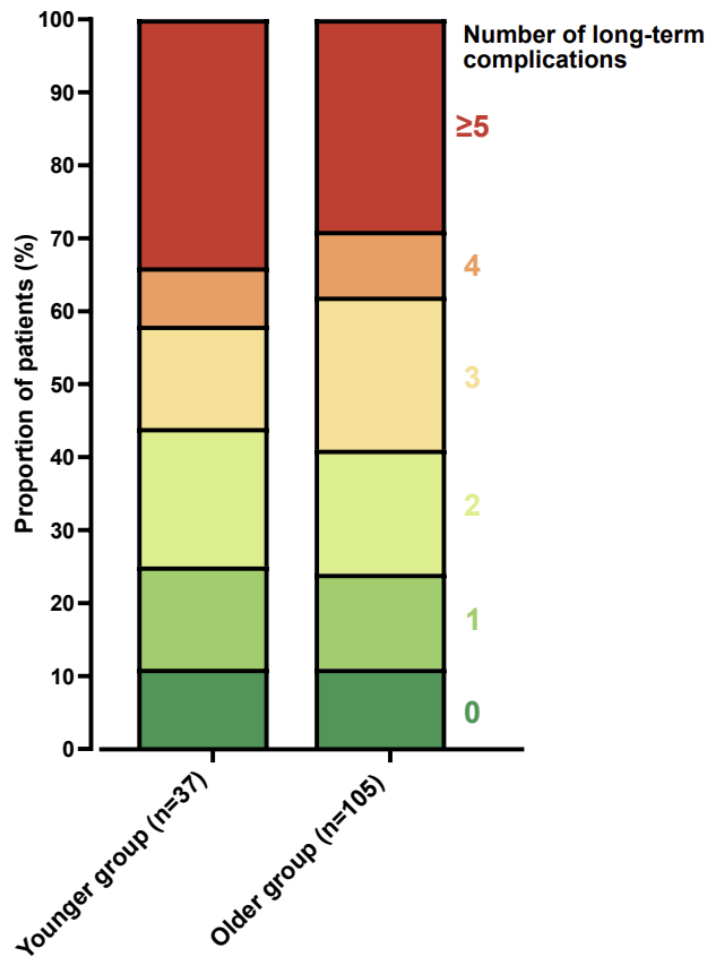

**Supplementary Figure 1: Distribution of the number of long-term complications per patient in younger and older group**

Distribution of the total number of the 20 long-term complications per patient among patients aged 2 to <4 years at HSCT (n = 37) and older children (n = 105), assessed at last follow-up. Percentages are indicated within each category.
