# Supplementary material
Source: Research Square preprint supplement (doi:10.21203/rs.3.rs-9554606/v1)
Supplement: Supplementary file 2 [file 078a19dfc972665b8532b00a.docx]

**Table 2: Distribution and prevalence of long-term complications by age group**

|  | **Younger group*** | **Older group*** | **All  Patients** | **p-value** |
| --- | --- | --- | --- | --- |
| n = 37 | n = 105 | n = 142 |  |
| n (%) or m±SEM | | | | |
| **Total number of long-term complications** |  |  |  | 1 |
| 0 | 4 (11) | 11 (11) | 15 (11) |  |
| 1 | 5 (14) | 14 (13) | 19 (13) |
| 2 | 7 (19) | 18 (17) | 25 (18) |
| 3 | 5 (14) | 22 (21) | 27 (19) |
| 4 | 3 (8) | 9 (9) | 12 (9) |
| 5 | 7 (19) | 15 (14) | 22 (16) |
| 6 | 3 (8) | 7 (7) | 10 (7) |
| 7 | 1 (3) | 4 (4) | 5 (4) |
| 8 | 2 (5) | 4 (4) | 6 (4) |
| 9 | 0 (0) | 1 (1) | 1 (1) |
| mean ±SEM | 3.3 ±0.4 | 3.2 ±0.2 | 3.2 ±0.2 | 0.9 |
| **Gonadal dysfunction** |  |  |  |  |
| Female | 7 (50) | 24 (77) | 31 (69) | 0.08 |
| Male | 10 (59) | 25 (40) | 35 (44) | 0.16 |
| **Short stature** | 23 (72) | 58 (63) | 81 (65) | 0.37 |
| **Cataract** | 23 (70) | 56 (58) | 79 (61) | 0.25 |
| **Hypothyroidism** | 16 (46) | 33 (34) | 49 (37) | 0.20 |
| **Pulmonary dysfunction** | 6 (19) | 40 (43) | 46 (37) | 0.01 |
| **Osteoporosis** | 4 (22) | 15 (21) | 19 (21) | 1 |
| **Metabolic syndrome** | 5 (14) | 18 (17) | 23 (16) | 0.61 |
| **Underweight** | 6 (16) | 15 (14) | 21 (15) | 0.78 |
| **Diabetes** | 5 (14) | 9 (9) | 14 (10) | 0.35 |
| **Subsequent malignant neoplasms** | 6 (16) | 8 (8) | 14 (10) | 0.20 |
| **Neurological complication** | 5 (14) | 7 (7) | 12 (9) | 0.30 |
| **Cardiomyopathy** | 1 (3) | 8 (8) | 9 (7) | 0.45 |
| **Obesity** | 1 (3) | 7 (7) | 8 (6) | 0.68 |
| **Chronic kidney disease** | 1 (3) | 3 (3) | 4 (3) | 1 |
| **Iron overload** | 1 (3) | 3 (3) | 4 (3) | 1 |
| **Alopecia** | 0 (0) | 3 (3) | 3 (2) | 0.57 |
| **Osteonecrosis** | 0 (0) | 3 (3) | 3 (2) | 0.57 |
| **Hearing loss** | 1 (3) | 1 (1) | 2 (1) | 0.46 |
| **Stroke** | 1 (3) | 1 (1) | 2 (1) | 0.46 |
| **Coronary artery disease** | 0 (0) | 1 (1) | 1 (1) | 1 |

Complications are listed in descending order according to their frequency in the overall cohort. Incomplete data in some cases. To calculate percentage, the denominator is equal to the number for which information was available. *Younger group : 2 to <4 years at HSCT ; Older group : 4 to <9 years (girls), 4 <10 years (boys) at HSCT.

SEM : standard error of mean
