# Supplementary material
Source: Research Square preprint supplement (doi:10.21203/rs.3.rs-9554606/v1)
Supplement: Supplementary file 3 [file cac3853b0cb641b745642849.docx]

**Table 3: Clinical characteristics, parental socioeconomic characteristics, and educational trajectory among patients no longer in education at last evaluation**

|  | **Younger group***  **n=8** | **Older group***  **n=45** | **p-value** |
| --- | --- | --- | --- |
|  | n (%) or m±SEM | | |
| **Clinical characteristics** |  |  |  |
| Male sex | 4 (50) | 31 (69) | 0.42 |
| Relapse | 4 (50) | 27 (60) | 0.71 |
| Time from diagnostic to evaluation | 28.5 ±2.2 | 23.4 ±0.9 | 0.04 |
| Age at evaluation | 28.2 ±3.0 | 27.2 ±0.5 | 0.69 |
| Number of long-term complications | 5.1 ±0.7 | 4.1 ±0.3 | 0.18 |
| **Parental socioeconomic characteristics** |  |  |  |
| **Parental educational level** |  |  | 0.66 |
| High school diploma or lower | 3 (50) | 20 (63) |  |
| Higher education | 3 (50) | 12 (38) |  |
| Missing | 2 | 13 |  |
| **Parental financial situation** |  |  | 1 |
| Comfortable | 4 (80) | 24 (77) |  |
| Financial difficulties | 1 (20) | 7 (23) |  |
| Missing | 3 | 14 |  |
| **Educational history** |  |  |  |
| **Educational level attained** |  |  | 0.68 |
| High school or lower | 4 (57) | 17 (42) |  |
| Higher education | 3 (43) | 24 (59) |  |
| Missing | 1 | 4 |  |
| **Grade retention** (after leukemia diagnosis) |  |  | 0.37 |
| No | 4 (67) | 13 (39) |  |
| Yes | 2 (33) | 20 (61) |  |
| Missing | 2 | 12 |  |
| **Academic support** |  |  | 0.38 |
| No | 4 (67) | 14 (41) |  |
| Yes | 2 (33) | 20 (59) |  |
| Missing | 2 | 11 |  |
| **Change in educational track** |  |  | 0.60 |
| No | 4 (67) | 27 (79) |  |
| Yes | 2 (33) | 7 (21) |  |
| Missing | 2 | 11 |  |

*Younger group: 2 to <4 years at HSCT; Older group: 4 to <9 years (girls), 4 to <10 years (boys) at HSCT.

This subanalysis was restricted to patients who were no longer in education at the time of the last evaluation, including 8 patients in the younger group and 45 in the older group (total, n = 53).

SEM: standard error of mean.
