# Supplementary material
Source: Research Square preprint supplement (doi:10.21203/rs.3.rs-9554606/v1)
Supplement: Supplementary file 4 [file d7c73880d5e00f31e46d6d8c.docx]

**Table 1: Baseline patient and HSCT characteristics**

|  | **Younger group***  n=37 | **Older group***  n=105 | **All Patients**  n=142 | **p-value** |
| --- | --- | --- | --- | --- |
|  | n (%) or m±SEM | | | |
| **Male sex†** | 22 (59) | 66 (63) | 88 (62) | 0.84 |
| **History of relapse before HSCT †** | 16 (43) | 48 (46) | 64 (45) | 0.85 |
| **Anthracycline total dose (mg/m²)‡** | 251 ±24 | 208 ±11 | 218 ±10 | 0.07 |
| **HSCT** |  |  |  |  |
| **Age at HSCT** (years) | 3.2 ±0.1 | 7.2 ±0.2 | 6.1 ±0.2 | <0.01 |
| **Conditioning regimen** |  |  |  | 0.87 |
| TBI + cyclophosphamide | 14 (38) | 47 (45) | 61 (43) |  |
| TBI + etoposide | 11 (30) | 25 (24) | 36 (25) |  |
| TBI + cytarabine and melphalan | 8 (22) | 21 (20) | 29 (20) |  |
| TBI + other | 4 (11) | 12 (11) | 16 (11) |  |
| **Donor and HLA match** |  |  |  | 0.56 |
| Matched sibling donor | 19 (51) | 42 (40) | 61 (43) |  |
| Mismatched relative | 4 (11) | 9 (9) | 13 (9) |  |
| Unrelated donor (not CB) | 9 (24) | 33 (31) | 42 (30) |  |
| Unrelated cord blood | 5 (14) | 21 (20) | 26 (18) |  |
| **GvHD** |  |  |  |  |
| Acute GvHD grade ≥2 | 19 (51) | 52 (50) | 71 (50) | 0.85 |
| Chronic GvHD | 4 (11) | 19 (18) | 23 (16) | 0.30 |
| **Long-term evaluation** |  |  |  |  |
| Total number of long-term evaluations                 1                 2                 3                 4                 ≥5 | 7 (19)  5 (14)  6 (16)  4 (11)  15 (40) | 16 (15)  20 (19)  18 (17)  19 (18)  32 (30) | 23 (16)  25 (18)  24 (17)  23 (16)  47 (33) | 0.65 |
| Age at last visit (years) | 20.1 ±1.6 | 22.4 ±0.8 | 21.8 ±0.7 | 0.15 |
| Time from diagnosis to last visit (years) | 17.7 ±1.6 | 16.8 ±0.8 | 17.1 ±0.8 | 0.61 |
| Time from HSCT to last visit (years)† | 16.9 ±1.6 | 15.2 ±0.8 | 15.6 ±0.7 | 0.29 |

*Younger group: 2 to <4 years at HSCT; Older group: 4 to <9 years (girls), 4 to <10 years (boys) at HSCT; †Variables used for matching, ‡Calculated according to Feijen, JAMA Oncol. 201912

SEM.: standard error of mean; HSCT : hematopoietic stem cell transplantation; CB: cord blood; TBI: total body irradiation; GvHD: graft-versus-host disease
